# Supplementary material
Source: Springer Nature journal article supplement (https://www.springermedizin.de/resource/supplementary/12874_2008_318_MOESM7_ESM.pdf/9434254)

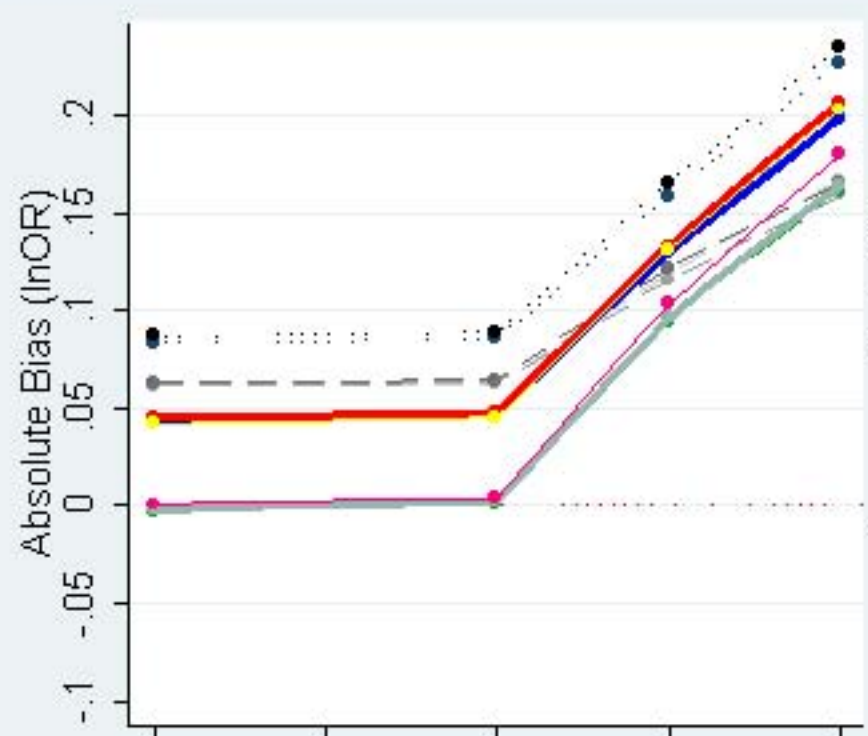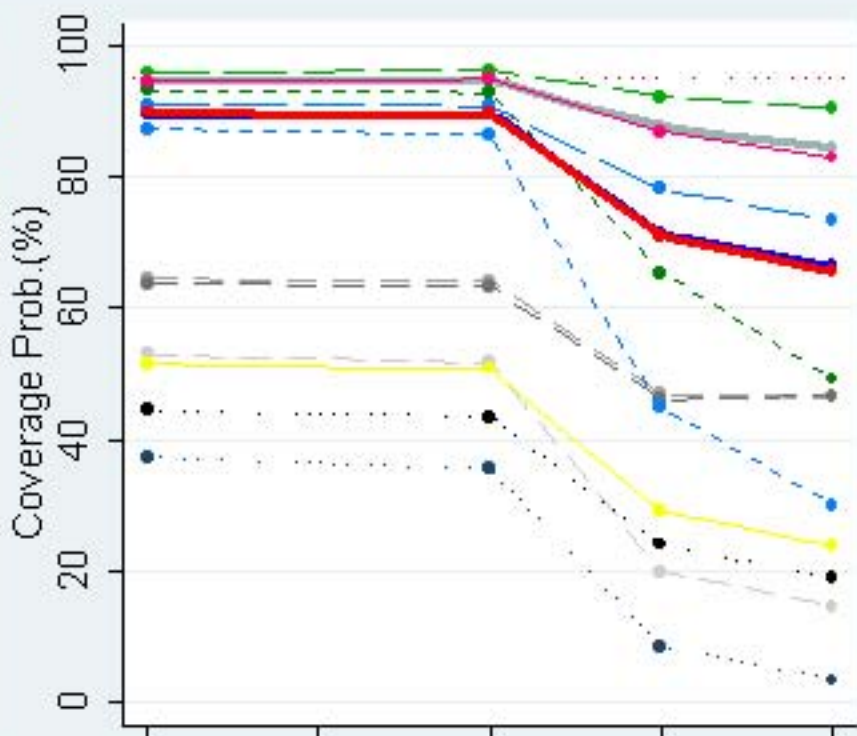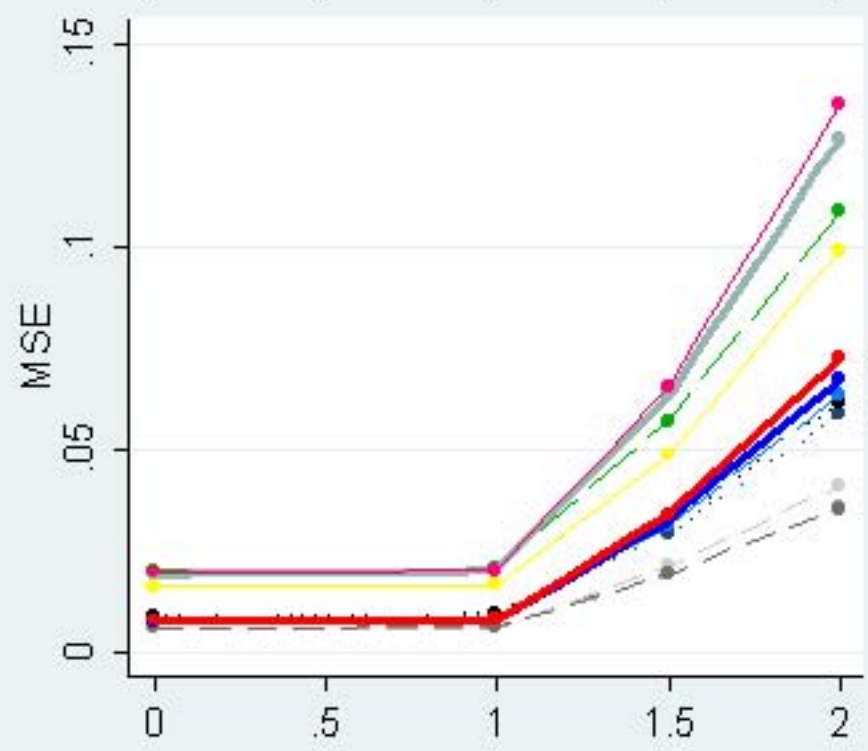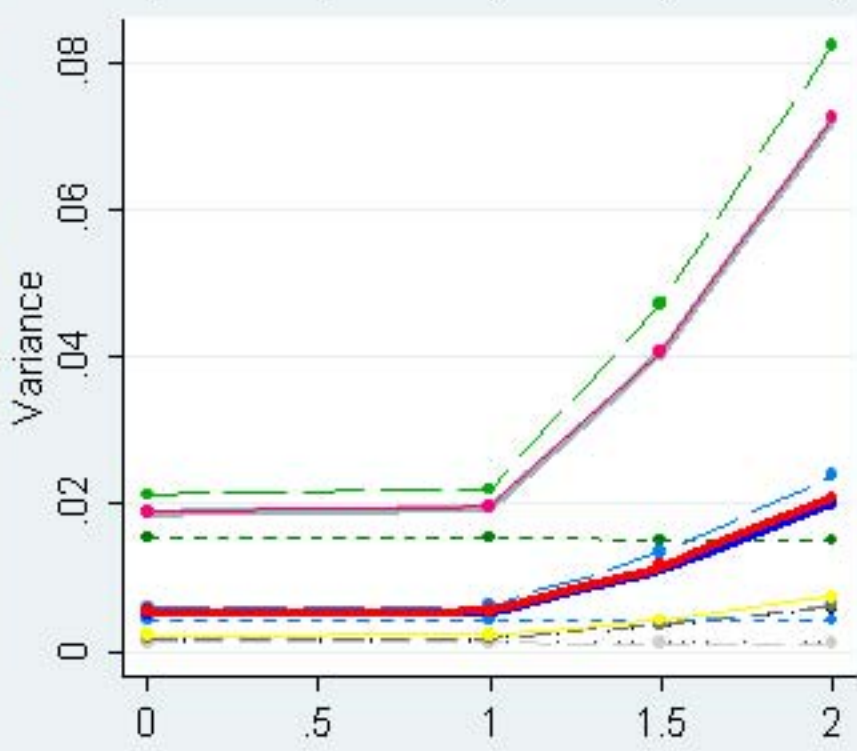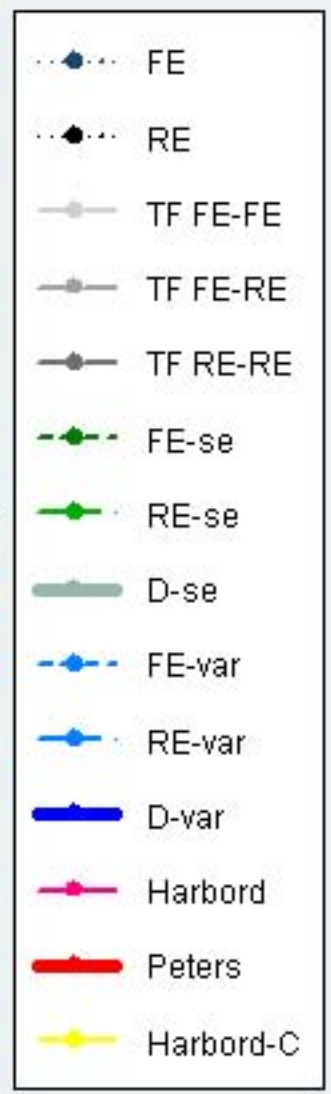

Supplement: MOESM7 [file 9434254]
